# Supplementary material
Source: publisher site journal article supplement (https://www.dovepress.com/article/593902)
Supplement: Supplementary file 1 [file 593902%20Revised%20Appendix%201.pdf]

## Appendix 1: Rowing Athlete Injury Survey Questionnaire

### I . Basic Information

1. Name: \_\_\_\_\_ 2. Gender: Male(  ) Female(  )

3. Age (years): \_\_\_\_\_ 4. Height (cm): \_\_\_\_\_

5. Weight (kg): \_\_\_\_\_ 6. Years of rowing training (years): \_\_\_\_\_

7. Training volume (in the past year): \_\_\_\_\_

Average training duration per day: Approximately (  ) hours/day

Average training days per week: Approximately (  ) days/week

Average training duration per week: Approximately (  ) hours/week

## II. Sports Injuries (Please fill in chronological order of injury occurrence)

Note:

Injury location: Chest, Shoulder, Elbow, Wrist, Upper Arm, Forearm, Lower Back, Thigh, Knee, Lower Leg, Ankle, Foot, Other.

Treatment received: e.g., Ice therapy, Heat therapy, Massage, Kinesio taping, Acupuncture, Tuina, Stretching, Cupping, Medicated compress, Light therapy (Phototherapy), Ultrasound therapy, Electrical stimulation therapy, Surgery, etc.

### First Injury in the Past Year:

1. Injury location:(  )
2. Injury mechanism: Sudden onset(  ) Gradual onset(  )  
Injury scenario (Answer if injury was sudden onset; skip if not):  
Strength training (  )    On-water training (  )    Running training (  )  
Ergo training (  )    Other(  )  
Main technical phase leading to injury (Answer if injured during on-water training; skip if not):  
Catch Phase (  )    Drive Phase (  )    Finish Phase (  )    Recovery Phase (  )
3. What treatment was received (multiple can be listed):(  )
4. Days rested before returning to training:  
0 days (  )    1-7 days (  )    8-28 days (  )    >28 days (  )

### Second Injury in the Past Year:

1. Injury location:(  )
2. Injury mechanism: Sudden onset(  ) Gradual onset(  )  
Injury scenario (Answer if injury was sudden onset; skip if not):  
Strength training (  )    On-water training (  )    Running training (  )  
Ergo training (  )    Other(  )  
Main technical phase leading to injury (Answer if injured during on-water training; skip if not):  
Catch Phase (  )    Drive Phase (  )    Finish Phase (  )    Recovery Phase (  )
3. What treatment was received (multiple can be listed):(  )

4. Days rested before returning to training:

0 days ( )      1-7 days ( )      8-28 days ( )      >28 days ( )

**Third Injury in the Past Year:**

1. Injury location:( )

2. Injury mechanism: Sudden onset( ) Gradual onset( )

Injury scenario (Answer if injury was sudden onset; skip if not):

Strength training ( )      On-water training ( )      Running training ( )

Ergo training ( )      Other( )

Main technical phase leading to injury (Answer if injured during on-water training; skip if not):

Catch Phase ( )      Drive Phase ( )      Finish Phase ( )      Recovery Phase ( )

3. What treatment was received (multiple can be listed):( )

4. Days rested before returning to training:

0 days ( )      1-7 days ( )      8-28 days ( )      >28 days ( )

**Fourth Injury in the Past Year:**

1. Injury location:( )

2. Injury mechanism: Sudden onset( ) Gradual onset( )

Injury scenario (Answer if injury was sudden onset; skip if not):

Strength training ( )      On-water training ( )      Running training ( )

Ergo training ( )      Other( )

Main technical phase leading to injury (Answer if injured during on-water training; skip if not):

Catch Phase ( )      Drive Phase ( )      Finish Phase ( )      Recovery Phase ( )

3. What treatment was received (multiple can be listed):( )

4. Days rested before returning to training:

0 days ( )      1-7 days ( )      8-28 days ( )      >28 days ( )

**Fifth Injury in the Past Year:**

1. Injury location:( )
2. Injury mechanism: Sudden onset( ) Gradual onset( )  
Injury scenario (Answer if injury was sudden onset; skip if not):  
Strength training ( ) On-water training ( ) Running training ( )  
Ergo training ( ) Other( )  
Main technical phase leading to injury (Answer if injured during on-water training;  
skip if not):  
Catch Phase ( ) Drive Phase ( ) Finish Phase ( ) Recovery Phase ( )
3. What treatment was received (multiple can be listed):( )
4. Days rested before returning to training:  
0 days ( ) 1-7 days ( ) 8-28 days ( ) >28 days ( )

**Sixth Injury in the Past Year:**

1. Injury location:( )
2. Injury mechanism: Sudden onset( ) Gradual onset( )  
Injury scenario (Answer if injury was sudden onset; skip if not):  
Strength training ( ) On-water training ( ) Running training ( )  
Ergo training ( ) Other( )  
Main technical phase leading to injury (Answer if injured during on-water training;  
skip if not):  
Catch Phase ( ) Drive Phase ( ) Finish Phase ( ) Recovery Phase ( )
3. What treatment was received (multiple can be listed):( )
4. Days rested before returning to training:  
0 days ( ) 1-7 days ( ) 8-28 days ( ) >28 days ( )
